# Supplementary material
Source: Royal Society of Chemistry journal article supplement (doi:10.1039/d6tc00652c)
Supplement: d6tc00652c1.pdf [file d6tc00652c1.pdf]

## Electronic Supplementary Information

### Flexible Large-Area Electrochromic Devices with Enhanced Cycling Stability Enabled by Ni/MnO<sub>2</sub> Hybrid Mesh Electrodes

Mengnan Wang,<sup>a</sup> Chunyang Su,<sup>a</sup> YINUO Du,<sup>b</sup> Waner Liu,<sup>b</sup> Shiqing Zhao<sup>\*b</sup> and Yanhua Liu<sup>\*a</sup>

<sup>a</sup> School of Optoelectronic Science and Engineering, Key Lab of Advanced Optical Manufacturing Technologies of Jiangsu Province & Key Laboratory of Flexible Optoelectronics and Micro/Nano Manufacturing of Jiangsu Province, Soochow University, Suzhou 215006, P. R. China.

<sup>b</sup> Key Laboratory of Efficient Low-carbon Energy Conversion and Utilization of Jiangsu Provincial Higher Education Institutions, School of Physical Science and Technology, Suzhou University of Science and Technology, Suzhou 215009, P. R. China.

Electronic mails: sqzhao@usts.edu.cn; yhliu@suda.edu.cn

1. Calculation formula of coloration efficiency (CE)

$$CE = \frac{\Delta OD}{\Delta Q} = \frac{\log\left(\frac{T_b}{T_c}\right)}{\Delta Q} \quad \backslash*$$

MERGEFORMAT (S1)

In this equation S1,  $\Delta OD$  is the change of optical density,  $\Delta Q$  is the inserting/extracting electronic charge,  $T_b$  and  $T_c$  are the transmittance of the bleached and colored state, respectively.

2. Calculation formula of Ion diffusion coefficient

$$i_p = kn^2 AD^{\frac{1}{2}} cv^{\frac{1}{2}} \quad \backslash* \text{ MERGEFORMAT (S2)}$$

In this equation S2,  $i_p$  is the current density of the oxidation-reduction peak,  $A$  is the electrode area,  $D$  is the diffusion coefficient,  $c$  is the ion concentration,  $n$  is the number of exchange electrons,  $v$  is the scan rate,  $k$  is the Randles-Sevick constant, equal to  $2.69 \times 10^5$ .

TABLE S1. Ion diffusion rate.

| Sample                      | $D_{in}$ (cm <sup>2</sup> /S) | $D_{out}$ (cm <sup>2</sup> /S) |
|-----------------------------|-------------------------------|--------------------------------|
| PET/ITO/WO <sub>3</sub>     | $1.76 \times 10^{-11}$        | $6.95 \times 10^{-12}$         |
| PET/Ni mesh/WO <sub>3</sub> | $9.00 \times 10^{-11}$        | $3.00 \times 10^{-12}$         |

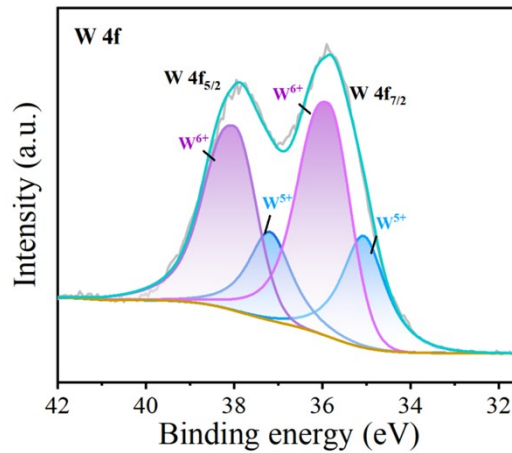

Fig. S1 XPS spectra of WO<sub>3</sub> thin films prepared by magnetron sputtering after coloring: W 4f spectrum.

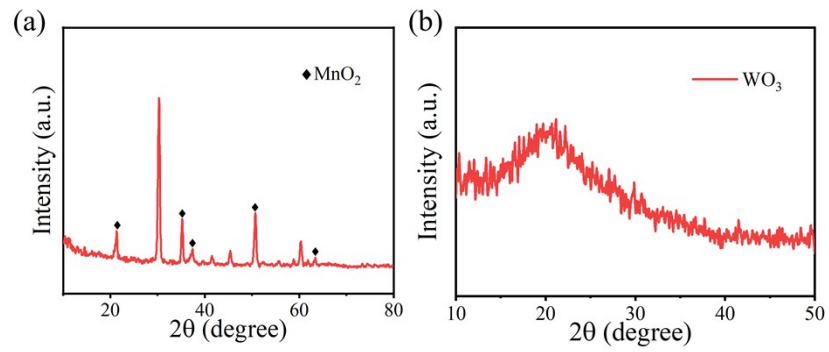

Fig. S2 XRD patterns: (a)  $\text{MnO}_2$ , (b)  $\text{WO}_3$ .

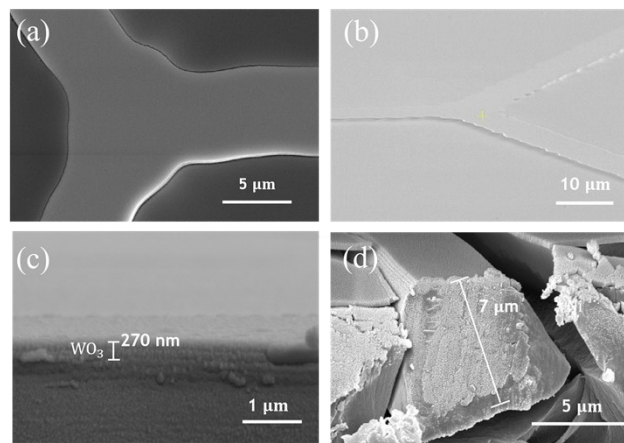

Fig. S3 (a) SEM image of PET/Ni mesh/ $\text{WO}_3$  sample surfaces. (b) SEM image with inclination state at  $10^\circ$ , (c) and (d) are cross-section SEM images of the sample.

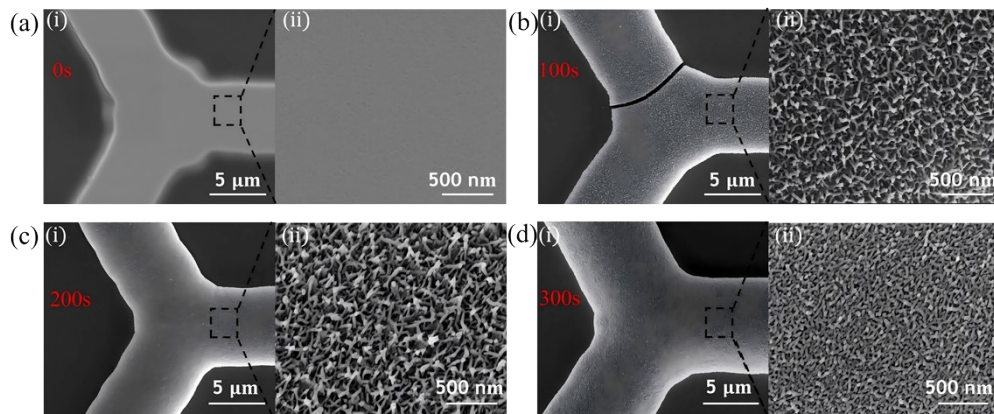

Fig. S4 Characterization diagram of the microstructure of the PET/Ni/ $\text{MnO}_2$  mesh electrode. SEM images of mesh electrodes prepared by depositing  $\text{MnO}_2$  on Ni mesh electrodes for 0 s (a), 100 s (b), 200 s (c), and 300 s (d), respectively (where Figure (i) shows the appearance of the hybrid mesh electrode and Figure (ii) shows the microstructure of  $\text{MnO}_2$ ).

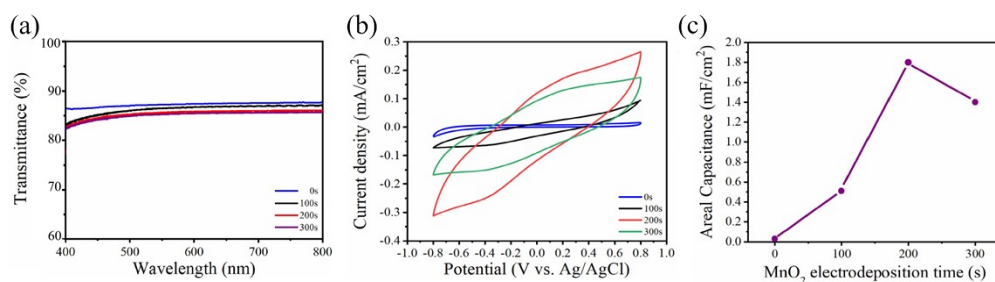

Fig. S5 (a) Transmittance curves and (b) cyclic voltammetry curves of PET/Ni/MnO<sub>2</sub> mesh electrodes with different MnO<sub>2</sub> deposition times. (c) Specific capacitance of PET/Ni/MnO<sub>2</sub> mesh electrodes with different MnO<sub>2</sub> deposition times (Voltage  $\pm 0.8$  V, sweep rate 50 mV/s).

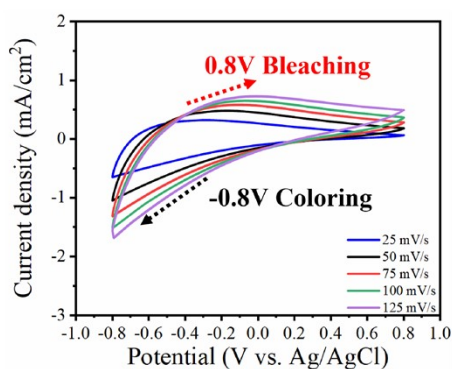

Fig. S6 Cyclic voltammetry curves of PET/ITO/WO<sub>3</sub> sample in 1 mol/L LiClO<sub>4</sub>/PC with arrows indicating the scanning direction.

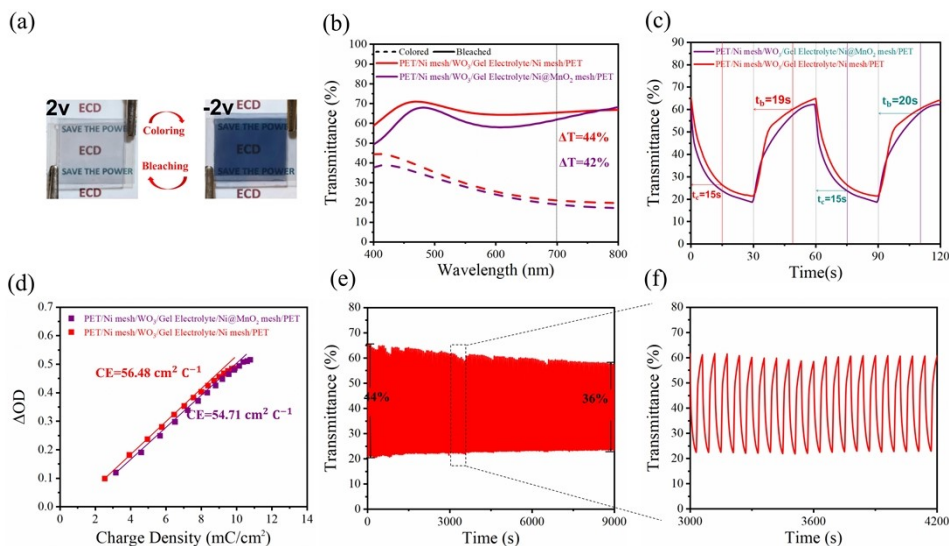

Fig. S7 (a) Images of PET/Ni mesh based flexible electrochromic devices for coloring and bleaching. (b) Transmittance curves and (c) response time curves of PET/Ni mesh and PET/Ni/MnO<sub>2</sub> mesh based flexible electrochromic devices for coloring and bleaching. (d) Density versus charge density curves. (e) Transmittance curves of PET/Ni mesh based flexible electrochromic device at 700 nm with coloring and bleaching cycle. (f) Detail curves of coloring and bleaching cycle variation at 700 nm for PET/Ni mesh based flexible electrochromic devices.

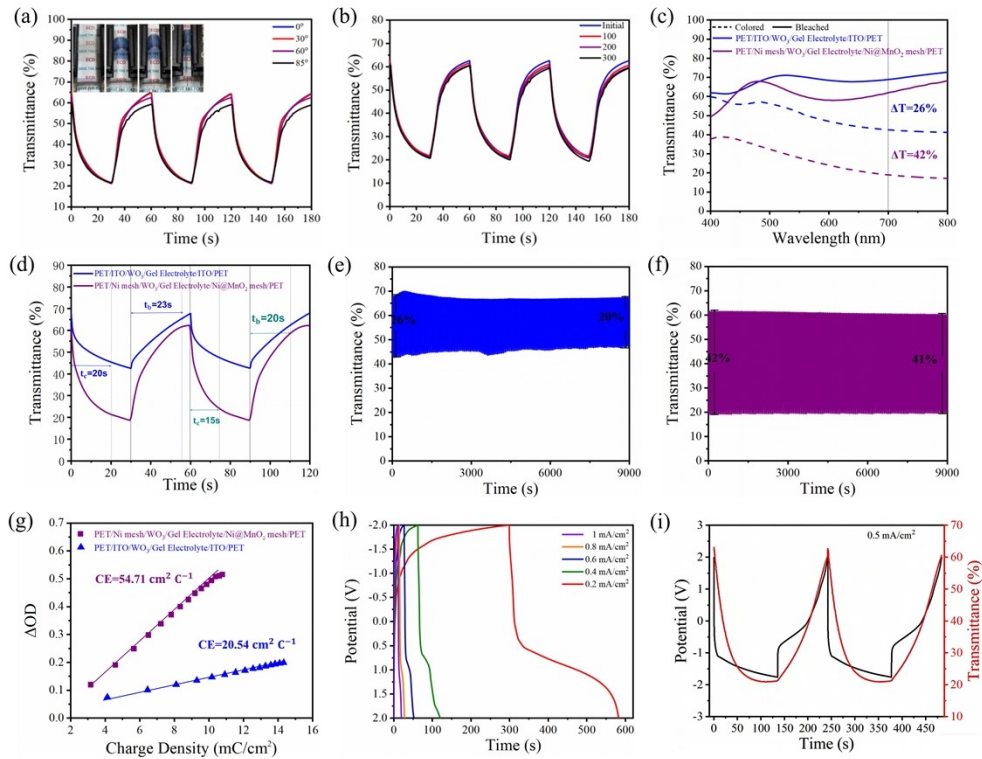

Fig. S8 (a) Transmittance versus coloring and bleaching cycle curves of PET/Ni mesh based flexible electrochromic devices under the bending angles of 0°, 30°, 60° and 85°, respectively (inset is the corresponding images of the four bending states). (b) Transmittance versus coloring and bleaching cycle curves of PET/Ni mesh based flexible electrochromic devices after 100, 200 and 300 times of bending with the bending angle 60°. (c) The transmittance curves and (d) response time curves for PET/ITO and PET/Ni/MnO<sub>2</sub> mesh based devices during coloring and bleaching. (e) The transmittance curves of PET/ITO and (f) PET/Ni/MnO<sub>2</sub> mesh electrode varies with the coloring-bleaching cycle at 700 nm. (g) Optical density as a function of the charge density for PET/ITO and PET/Ni/MnO<sub>2</sub> mesh based devices at 700 nm. (h) GCD curves of PET/Ni/MnO<sub>2</sub> mesh based devices at different current densities from 0.2 to 1 mA/cm<sup>2</sup>. (i) GCD versus transmission cycling curve at a current density of 0.2 mA/cm<sup>2</sup>.

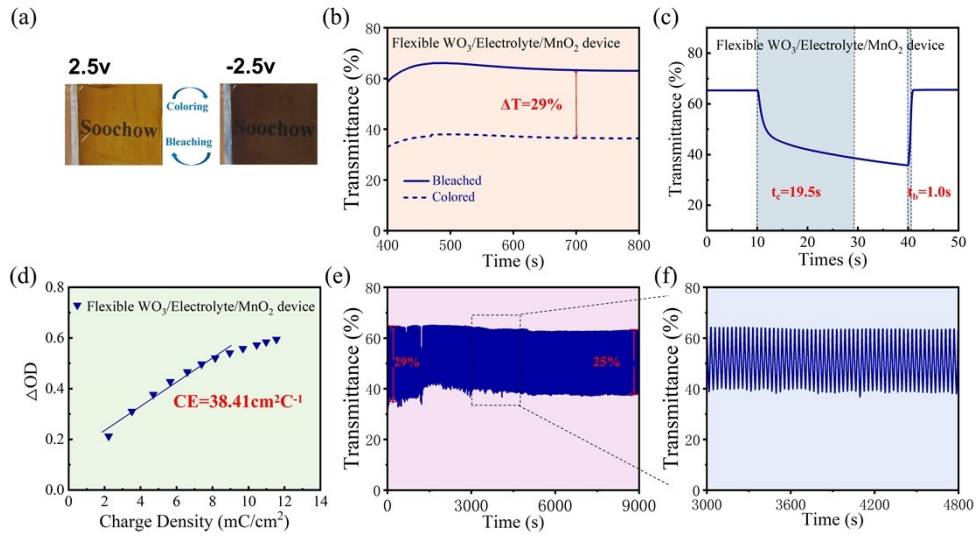

Fig. S9 (a) Images of PET/ITO electrode based flexible electrochromic devices for coloring and bleaching. (b) Transmittance curves and (c) response time curves of PET/ITO/ $\text{MnO}_2$  electrode based flexible electrochromic devices for coloring and bleaching. (d) Density versus charge density curves. (e) Transmittance curves of PET/ITO electrode based flexible electrochromic device at  $700\text{nm}$  with coloring and bleaching cycle. (f) Detail curves of coloring and bleaching cycle variation at  $700\text{nm}$  for PET/Ni mesh based flexible electrochromic devices.
